# Supplementary material
Source: Springer Nature journal article supplement (https://www.springermedizin.de/resource/supplementary/12939_2012_245_MOESM3_ESM.pdf/9550730)

Life Expectancy

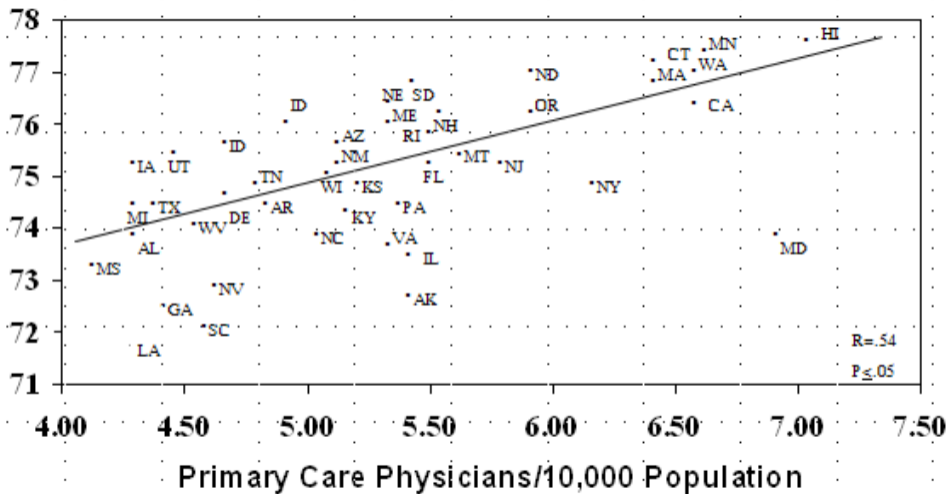

Supplement: MOESM3 [file 9550730]
